# Supplementary material for: Synthesis and electrochemical performance of hierarchically porous N-doped TiO2 for Li-ion batteries
Source: Royal Society of Chemistry journal article supplement (doi:10.1039/c3nj01332d), 2014-01-01
Supplement: c3nj01332d.pdf [file c3nj01332d.pdf]

## Supporting Information

### Synthesis and Electrochemical Performance of Hierarchically Porous N-doped TiO<sub>2</sub> for Li-ion Batteries

By George Hasegawa,\* Tatsuya Sato, Kazuyoshi Kanamori, Kazuki Nakanishi and Takeshi Abe

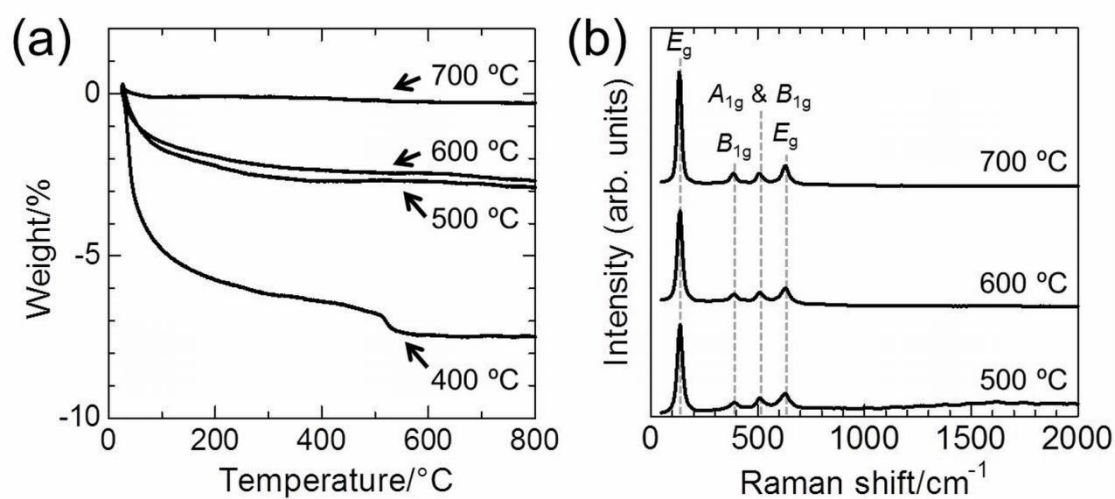

Figure S1 (a) TG curves and (b) Raman spectra of the samples calcined at different temperatures.

Only the bands attributed to anatase are observed in all the Raman spectra.

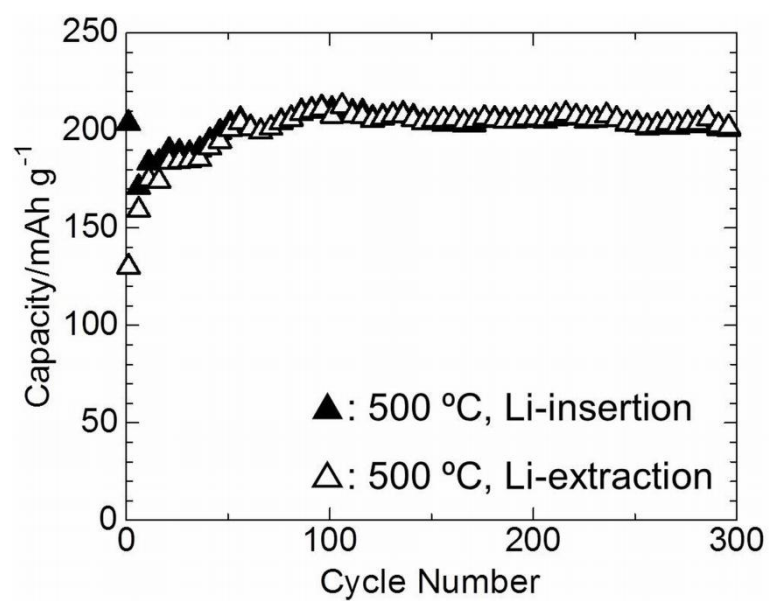

Figure S2 Cycle performance of the sample calcined at 500 °C at 100 mA g<sup>-1</sup>.
